# Supplementary material for: Fabrication of a Flexible Aqueous Textile Zinc-Ion Battery in a Single Fabric Layer
Source: Frontiers journal article supplement (doi:10.3389/felec.2022.866527), 2022-06-06
Supplement: Presentation_1.pdf [file Presentation_1.pdf]

## Supplementary Material

### Supplementary Figures

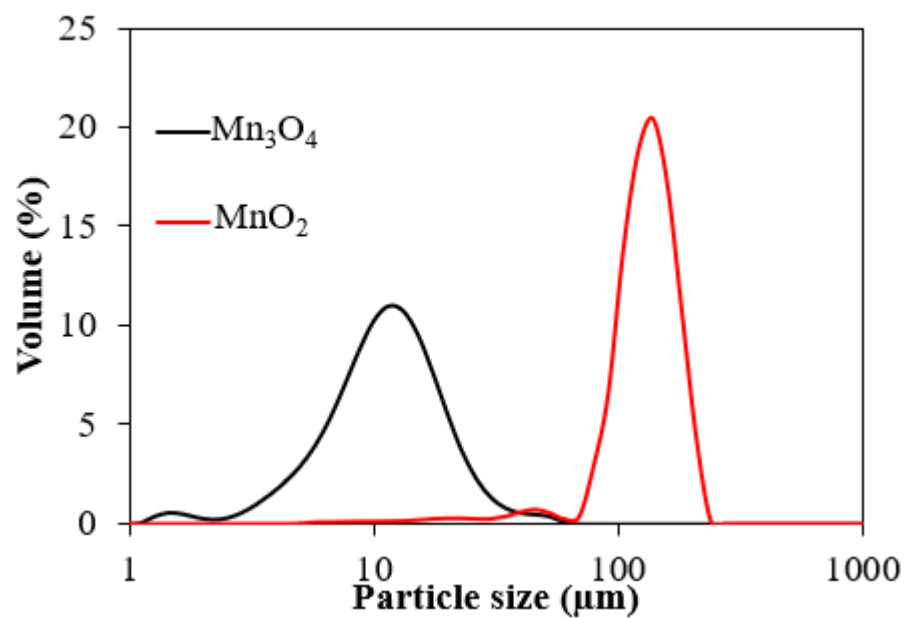

**Supplementary Figure 1.** Particle size distribution of  $\text{MnO}_2$  and  $\text{Mn}_3\text{O}_4$  powder. Average particle sizes are 11.5  $\mu\text{m}$  and 138  $\mu\text{m}$  for the  $\text{Mn}_3\text{O}_4$  and  $\text{MnO}_2$  respectively.
